# Supplementary material for: Selective Inhibition of EZH2 by EPZ-6438 Leads to Potent Antitumor Activity in EZH2 -Mutant Non-Hodgkin Lymphoma
Source: Oxford University Press journal article supplement (doi:10.1158/1535-7163.mct-13-0773), 2014-02-22
Supplement: 15357163mct130773-sup-tab2.xlsx [file 15357163mct130773-sup-tab2.xlsx]

## Sheet: Table S2A
			WSU-D2-High	WSU-D4-High	WSU-D6-High	WSU-D2-High	WSU-D4-High	WSU-D6-High		SUDHL6-D2-High	SUDHL6-D4-High	SUDHL6-D6-High	SUDHL6-D2-High	SUDHL6-D4-High	SUDHL6-D6-High		KARPAS-D2-High	KARPAS-D4-High	KARPAS-D6-High	KARPAS-D2-High	KARPAS-D4-High	KARPAS-D6-High
Group	Probe ID	Gene symbol	Log2 Ratio	Log2 Ratio	Log2 Ratio	p-value	p-value	p-value		Log2 Ratio	Log2 Ratio	Log2 Ratio	p-value	p-value	p-value		Log2 Ratio	Log2 Ratio	Log2 Ratio	p-value	p-value	p-value
A	201565_s_at	ID2	1.17968	1.12698	1.56528	0.000249149	8.43208e-05	0.000945682		1.13995	1.81773	1.11036	0.0079136	0.00161589	0.00407337		1.81721	3.31239	4.54923	0.000217006	6.95732e-05	1.2274e-05
	203680_at	PRKAR2B	1.42665	2.60612	2.7187	0.0103447	0.000148204	0.000138562		1.90734	1.32029	2.00871	0.00580087	0.0062386	0.00139539		1.26502	1.4431	1.20258	0.000754692	0.000732331	0.0232102
	204720_s_at	DNAJC6	1.86795	2.35771	2.61042	0.000357278	1.86987e-05	0.00110639		1.41652	1.3719	1.43003	0.0489666	9.76106e-05	0.00154119		1.42684	1.38388	1.31932	0.00131265	0.00516863	0.0212435
	205933_at	SETBP1	2.03422	2.62699	2.3896	0.000680166	0.000195246	0.000161253		1.3978	1.65773	2.45653	0.0302705	0.00268157	0.000259928		1.48429	1.15173	2.07624	2.06742e-05	0.00509664	0.00010743
	209459_s_at	ABAT	2.21419	3.48674	3.87382	0.000649811	0.000334022	1.63484e-05		2.05551	4.10618	4.98572	0.0131451	7.15832e-06	0.000103506		1.88525	3.62898	4.30225	0.00315326	1.15064e-05	1.35299e-05
	209460_at	ABAT	2.03669	2.89159	3.19778	0.000384812	0.00021659	0.000597557		1.26368	3.03738	3.9031	0.00252413	2.65897e-06	0.000244339		1.53394	3.00051	4.00428	0.00167338	1.05124e-05	0.000287406
	210986_s_at	TPM1	1.67719	2.5841	1.8613	0.000764097	1.08181e-05	0.0198806		1.93424	1.88916	1.33948	0.0287389	7.60196e-06	0.00134697		1.08368	1.43682	1.83342	0.000950071	0.0134535	0.000215258
	212956_at	TBC1D9	2.64084	3.86795	4.64445	0.00936397	0.000152517	1.3364e-05		1.24149	2.17283	2.11952	0.00425274	5.03283e-05	0.000771078		1.15619	2.91395	3.66121	0.00456475	0.000498263	3.32529e-05
	218175_at	CCDC92	1.70915	2.12045	2.04692	0.000299369	0.00164538	5.48654e-05		1.35181	1.69164	2.84362	0.00445746	5.20725e-05	0.00299116		1.20822	1.9268	2.67295	0.00138278	0.000606807	1.95794e-06
	223136_at	AIG1	1.7237	3.32168	4.27242	0.00221519	3.22346e-05	0.0017111		1.65522	2.1158	2.1515	0.0147747	0.000712795	0.000749176		1.20089	2.07088	2.20134	0.0125127	0.00172752	0.000332852
	225613_at	MAST4	1.69282	1.68163	2.15082	0.00120625	0.00151536	0.000125378		1.04955	1.15439	1.94283	0.0221746	0.00822516	0.000866148		1.33168	2.07799	3.05769	2.05243e-05	0.00199031	0.000233443
	226225_at	MCC	1.28132	1.90659	2.78032	0.00333441	5.60499e-05	0.00292151		1.05515	2.19028	3.36152	0.0181166	0.000879471	0.00135082		1.34862	2.45701	2.81885	5.48841e-05	0.00087353	9.466e-05
	227478_at	SETBP1	2.14396	3.07021	3.14423	6.61523e-05	0.000728694	4.99699e-05		1.34919	2.26943	2.50361	0.0179077	0.00267663	0.000810935		1.08058	1.55646	2.84504	0.000544841	0.00632891	0.00127768
	228377_at	KLHL14	1.50092	1.57272	2.23431	3.44028e-05	0.011233	0.000135884		1.63827	2.40108	1.98147	0.0354222	4.00837e-05	0.00150079		1.68021	2.18386	4.32712	0.000171761	0.000435616	7.29711e-07
B	1568597_at	LOC646762	1.13381	1.64635	1.94563	0.00211823	0.000456025	0.000766913		1.02471	1.7715	2.7531	0.000203851	0.00132245	4.26958e-06
	200704_at	LITAF	1.29233	1.19122	1.73159	0.00890356	0.00248041	0.00118132		1.08036	1.49806	1.62419	0.0272588	0.000473499	0.00045086
	201760_s_at	WSB2	1.98141	2.42345	3.18759	0.000139	0.001632	0.000203435		1.54464	1.52017	1.70855	0.0422797	0.000712461	0.000267066
	202260_s_at	STXBP1	1.6412	2.30918	3.06792	0.000495752	0.00160269	3.96173e-05		1.02086	1.12307	1.59284	0.0304902	0.000408269	0.00463457
	202336_s_at	PAM	1.54928	1.77223	2.93567	0.00314414	0.0131724	0.00110433		1.29361	1.27318	2.13412	0.0270185	0.00131151	0.00122482
	202371_at	TCEAL4	1.20306	2.09061	1.53475	0.0124417	0.000291088	0.0169356		2.09681	2.44731	2.63461	0.0041348	0.0103455	0.00789208
	203097_s_at	RAPGEF2	1.35586	1.86174	2.16746	3.89755e-05	0.00745036	0.000125012		1.98577	3.54083	4.33958	0.0224582	6.18121e-07	2.08851e-05
	203935_at	ACVR1	1.07031	1.62041	1.54787	0.0118977	0.00497399	0.00370195		1.01998	1.19046	1.17374	0.0434829	0.0107233	0.000205146
	204040_at	RNF144A	1.4018	1.40813	1.5063	0.000934698	2.77206e-05	0.0085607		1.39167	1.08776	1.5319	0.00122422	0.00100547	0.000948146
	207996_s_at	C18orf1	1.43519	1.81723	2.2283	0.00234899	0.00106689	0.000205172		1.03282	1.37659	2.20089	0.00929903	0.00356839	0.0011293
	209234_at	KIF1B	1.29811	1.60947	1.06705	0.00136675	0.00608271	0.013993		1.09298	1.31532	1.41469	0.000112041	0.00347259	0.00393614
	209504_s_at	PLEKHB1	1.34609	2.23015	2.62606	0.000451408	3.38645e-05	0.000244395		1.06702	1.36578	1.56147	0.0312951	0.000382438	7.44588e-05
	209605_at	TST	2.07492	2.30015	2.14203	1.00391e-05	9.86556e-05	0.00025726		1.63633	2.14996	1.76874	0.0149709	0.000160882	0.005057
	209859_at	TRIM9	2.01278	3.68781	3.71166	0.00584576	0.000118554	1.82757e-06		1.14617	1.25913	1.05421	0.00297251	0.000496384	0.000858169
	210105_s_at	FYN	1.41897	2.11591	3.61249	0.00218282	0.0112823	0.000564766		1.24469	1.23274	2.01144	0.0451815	0.00183688	0.00397785
	211474_s_at	SERPINB6	1.39964	1.54484	2.11366	0.000207843	0.000306974	0.00316584		1.43564	2.28629	1.86797	0.0109717	9.72158e-05	0.000186694
	212256_at	GALNT10	1.37041	2.21843	1.84214	0.0040968	0.00757226	0.000237738		1.00658	1.09474	1.65115	0.0497976	0.00625061	0.000378825
	212538_at	DOCK9	1.33789	1.61786	2.25538	0.000485013	0.000917195	0.00188784		1.19277	1.39768	2.77393	0.014841	8.75074e-05	0.000455568
	212778_at	PACS2	1.47439	2.29837	1.67821	0.00406274	0.00577197	0.00438936		1.24694	1.26395	2.15782	0.0390721	0.0250249	0.000124482
	214369_s_at	RASGRP2	1.17675	1.73771	1.76748	0.00271901	7.69984e-05	0.000836358		1.21974	2.18016	2.55357	0.0118091	0.000706281	8.50864e-05
	217771_at	GOLM1	1.10347	1.05751	1.3771	0.0019799	0.00146429	0.00472514		1.43688	1.71938	1.70855	0.015849	0.000398455	0.000645119
	217820_s_at	ENAH	2.18277	3.62803	4.44687	0.00226486	0.000113235	4.99634e-05		1.43596	1.6369	2.19344	0.000317805	0.00195151	1.0339e-06
	217967_s_at	FAM129A	1.31019	1.46534	2.54704	0.000333742	7.43155e-06	6.03339e-05		1.28092	1.75049	2.09867	0.000385997	0.00137997	0.000364548
	218346_s_at	SESN1	1.31626	2.28845	2.90832	0.000283283	0.000360832	0.000211949		1.20089	1.38747	1.55626	0.0241202	0.000458815	0.000243573
	218380_at	LOC728392 /// NLRP1	1.28771	1.29393	2.17149	0.00425736	0.00163961	0.000448513		1.19952	1.75569	2.65642	0.0248642	0.00268712	0.000873328
	218501_at	ARHGEF3	1.4026	2.40978	2.60244	0.000396384	1.15051e-05	6.73166e-05		1.06632	1.65102	2.39239	0.0022017	6.07778e-06	0.000144217
	221778_at	JHDM1D	1.01822	1.33243	2.7525	0.000266418	0.00805336	0.000267247		1.06763	1.27207	2.15192	0.00305045	0.000451848	0.00725741
	222409_at	CORO1C	1.4933	1.24951	1.9519	4.24231e-05	0.000828089	0.000808457		1.57298	1.45142	1.46413	0.0206173	9.41957e-05	0.00034023
	222433_at	ENAH	1.16909	2.61977	3.08891	0.00230273	0.000195332	0.000163122		1.30339	1.32754	1.17394	0.0413921	0.00687287	0.00225098
	225331_at	CCDC50	1.99239	1.81521	3.36819	2.55965e-05	0.00294799	1.36681e-05		1.4304	1.83217	1.30539	0.0188666	0.00139706	0.000447035
	226184_at	FMNL2	1.46474	2.69497	3.51504	0.000424487	0.000475203	1.16555e-05		1.12912	1.15847	1.45257	0.0415913	0.000341221	0.00168298
	226771_at	ATP8B2	1.88235	2.18067	1.7779	0.00106254	0.000522481	5.6858e-05		1.05026	2.14704	2.21399	0.0471632	0.00177989	0.000878974
	227001_at	NIPAL2	2.14345	2.44559	3.05066	0.00191309	7.30227e-05	1.85377e-05		1.16223	2.11321	2.32297	0.000104853	0.0013476	0.000134249
	227611_at	TARSL2	1.56725	2.82738	2.60923	0.000789289	3.02919e-05	0.000566556		1.14442	1.19216	1.86463	0.0310108	0.0159228	0.0142123
	235142_at	ZBTB8A	1.63751	1.65895	1.03705	0.00511541	0.000209703	0.043642		2.03241	2.02161	1.80471	0.022577	0.000384543	0.000758882
	238447_at	RBMS3	2.05452	2.48349	3.15133	1.49405e-05	0.000297421	7.68884e-05		1.27595	2.05619	3.70655	0.00218036	0.00058803	0.000911993
C	1560225_at	CNR1	1.7114	1.29115	2.87466	0.000950675	0.00823023	0.000552479									2.66798	3.63598	4.93919	0.000303824	4.02756e-05	1.37078e-05
	200771_at	LAMC1	1.26498	1.32404	1.3721	0.000125304	0.0117692	0.00831301									1.33194	1.45761	2.03127	0.00160737	0.00153977	2.69777e-05
	201301_s_at	ANXA4	1.58968	2.67466	2.78904	0.000170945	7.27077e-05	1.25489e-05									1.06726	1.90932	1.97603	0.00073947	0.00192914	0.000517561
	201315_x_at	IFITM2	1.4726	1.58184	1.65042	4.4608e-05	0.00198717	0.00303118									1.09046	1.78343	1.65717	0.000295709	0.000792444	2.36909e-05
	203066_at	CHST15	2.10655	1.97499	3.11487	0.000482266	0.00112233	4.86172e-05									1.47886	2.41035	3.6939	0.00352683	0.00806762	0.00237707
	203704_s_at	RREB1	1.05208	1.59269	1.82127	0.000873371	0.00232294	0.00066151									1.0653	1.21657	1.94654	0.00153824	0.0025551	0.00116466
	206513_at	AIM2	1.02262	1.70963	1.82087	0.00183732	0.000790413	0.000321602									1.3258	2.80472	3.55249	0.00231233	0.00373668	1.58741e-05
	210001_s_at	SOCS1	1.01881	1.29631	1.35217	0.00147229	4.01951e-05	0.00766414									1.1199	1.68425	2.21714	0.00171934	0.00024644	0.00113115
	212599_at	AUTS2	1.91148	2.3976	2.96233	0.0020429	0.000382968	5.63373e-06									1.01357	1.73269	2.57022	7.52312e-05	0.000101534	5.49234e-06
	212820_at	DMXL2	1.79169	3.33075	3.62645	0.000840446	0.000126972	5.76925e-05									1.42545	2.01372	3.15992	0.000950536	0.000330814	0.000503626
	213353_at	ABCA5	1.44619	1.90069	2.58431	0.00586695	0.000402377	0.000379123									1.19734	1.59843	2.45924	0.00330037	0.00567351	4.77562e-05
	213436_at	CNR1	3.59957	2.35432	5.01082	0.000216133	0.000299663	0.000543558									2.91148	4.32116	6.078	0.000382681	2.53142e-06	0.000141744
	219841_at	AICDA	1.37029	1.76147	3.33335	0.00152284	0.00232047	8.55362e-06									1.1085	2.03957	3.07531	0.00399411	0.00367333	0.00143609
	221011_s_at	LBH	1.96032	1.81168	2.54434	2.35647e-05	0.0182113	0.000260079									1.69837	1.66564	2.51948	0.000626572	0.00980742	1.23658e-05
	221234_s_at	BACH2	1.66636	1.7171	2.78539	8.53403e-05	0.00241614	5.86895e-05									1.75541	3.1929	4.18815	0.00455461	9.78843e-05	1.05081e-05
	222108_at	AMIGO2	1.31844	2.01302	2.87307	0.0159191	0.00109766	0.000475828									1.23655	2.17465	2.28854	0.00108533	0.000145926	1.16846e-05
	223519_at	ZAK	2.25695	2.49249	2.66723	3.71385e-05	0.000661019	0.000363162									1.19586	1.1758	1.62562	0.0128611	0.00391761	0.00159651
	224499_s_at	AICDA	1.70788	1.69191	3.31881	1.17157e-06	0.00339149	1.208e-06									1.38518	2.37497	4.0416	0.00172238	0.000226062	0.00293968
	224983_at	SCARB2	1.52077	2.42471	2.47203	0.00517715	0.00649878	0.000545786									1.15294	1.47983	1.49487	0.000442772	0.00333956	0.00114212
	225611_at	MAST4	1.07395	1.45877	1.67692	0.00316903	0.000417266	0.000712898									1.00276	1.71145	2.60632	0.000796042	0.0011135	7.85568e-06
	225662_at	ZAK	2.2842	3.03316	3.33447	0.000113228	2.91436e-05	0.000129654									1.54432	1.45986	1.87873	0.000894318	0.00488062	7.10411e-05
	225665_at	ZAK	1.84191	3.09705	3.27838	0.000256897	8.08483e-05	1.98567e-05									1.17262	1.31237	2.06643	0.00322849	0.000310045	0.0014768
	225710_at	GNB4	1.68368	1.07305	1.90052	0.00764557	0.00445747	0.00101072									1.5096	1.99938	2.20794	0.00711096	0.00660033	0.00294718
	225912_at	TP53INP1	1.88589	1.10452	2.97105	0.000110718	0.0063142	1.25381e-05									1.31647	2.04177	3.21835	0.000345899	0.000134147	6.50639e-05
	226344_at	ZMAT1	1.29559	1.91719	3.26035	0.00148452	0.00412634	0.000584069									1.21991	1.80668	2.87717	0.00200564	0.00206959	0.000689032
	227020_at	YPEL2	2.11706	1.80805	2.42304	3.10968e-05	0.00681115	0.000232308									1.41221	1.66954	2.10256	0.00145562	7.49819e-06	1.68047e-05
	227173_s_at	BACH2	1.4649	1.39527	2.31928	0.000369654	0.000761761	1.4053e-05									1.3949	2.42575	3.67094	1.42947e-05	0.000161802	3.06258e-05
	230712_at	NBPF1	1.97261	1.9814	1.37869	0.000142123	0.0158168	0.000349311									1.00462	1.08322	1.3133	0.00729688	0.0455164	0.000230071
	236796_at	BACH2	2.69878	1.85029	2.79191	0.00037669	0.0320066	0.000106503									1.68488	2.7984	4.52097	0.00187692	0.000676783	0.000231039
D	200897_s_at	PALLD								1.77866	1.82592	1.49531	0.00773191	0.000274263	0.00605513		1.31361	1.45364	1.33567	0.00108112	0.00175436	0.00893095
	201811_x_at	SH3BP5								1.31266	2.86921	2.28195	0.0144975	1.78371e-05	2.78596e-05		1.17643	2.0244	2.90698	0.0328562	0.000962439	5.74053e-05
	203504_s_at	ABCA1								1.90315	2.00335	1.57617	0.0364182	0.00273714	0.000492717		1.53732	2.42605	3.14175	7.84164e-05	0.000129169	2.12202e-07
	203505_at	ABCA1								1.70891	2.21872	1.98228	0.0129328	0.00228403	0.00110733		1.86353	2.31708	3.29258	0.000414895	0.000358018	6.3807e-05
	205407_at	RECK								1.64272	3.15536	3.623	0.00102742	0.000308779	0.00218139		1.27742	2.28052	2.93142	0.00471628	0.00231354	3.93399e-05
	206857_s_at	FKBP1B								1.72453	1.73747	1.13525	0.0211751	0.000439839	0.00327241		1.03709	1.42718	1.21665	0.00966457	0.0162458	0.00119238
	213664_at	SLC1A1								2.13814	2.76526	3.13806	0.0223072	6.34414e-05	0.00127011		1.18229	2.13629	2.6314	0.000287126	0.0112835	0.000229869
	213931_at	ID2 /// ID2B								1.15115	1.63171	1.64897	0.0234759	0.000452975	0.00017029		1.72809	2.32435	4.56261	0.0123077	0.00494522	1.81348e-05
	227856_at	C4orf32								1.30349	1.09302	1.2456	0.0467938	0.00290462	0.00271701		1.54498	2.43912	3.24251	0.00122758	0.00129299	1.42756e-05
	235333_at	B4GALT6								1.56733	1.61144	1.6104	0.0264243	0.00119687	0.000249709		1.00888	1.14406	1.35077	0.00376786	0.00395351	9.23341e-05
E	1552390_a_at	C8orf47	1.02441	1.17041	1.3591	4.52242e-05	0.0116943	0.00208434
	1552448_a_at	C8orf12	1.47461	3.45745	3.34312	0.0152746	0.00355758	1.04353e-05
	1553145_at	FLJ39653	1.6606	1.65136	2.10467	0.00100843	0.0062455	2.92228e-05
	1554250_s_at	TRIM73	1.21798	1.0542	1.39228	0.0116289	0.00726653	0.00167255
	1555801_s_at	ZNF385B	1.18189	2.9087	3.78976	0.0236733	0.000374724	9.64635e-05
	1556167_at	HEATR7B1	1.49	2.66117	2.28643	0.000660457	1.84297e-05	0.0149715
	1556474_a_at	FLJ38379	1.51774	2.9144	2.27999	0.00478533	0.00661107	0.00542765
	1556827_at	LOC339929	1.22674	1.43908	1.58797	3.3326e-05	0.019322	0.0051493
	1559413_at	TCP11L2	1.34293	1.0581	2.52394	0.000959637	0.0488795	0.000721043
	1560703_at	C17orf108	1.01952	1.15884	1.39921	0.011905	0.00904839	0.00303387
	1561666_a_at	KIAA1908	1.36461	1.38982	1.2006	0.00224892	0.000369826	0.000347617
	1569675_at	POU2AF1	1.33634	1.74828	2.14758	0.0129727	0.00100362	0.000115257
	200696_s_at	GSN	1.37898	1.43768	1.60691	0.00115587	0.000302826	0.000462318
	200765_x_at	CTNNA1	1.07714	1.26797	1.84581	0.000478626	0.000886078	3.72168e-05
	200872_at	S100A10	2.02004	1.02398	1.58212	0.000128037	0.0100153	6.35002e-05
	201218_at	CTBP2	1.44424	1.20328	1.36166	5.43842e-05	0.0126117	0.00118976
	201302_at	ANXA4	2.09618	3.65555	3.85139	0.000317476	0.000315276	0.00014322
	201403_s_at	MGST3	1.1927	1.86652	2.19377	3.33318e-05	0.000596599	0.000156643
	201425_at	ALDH2	1.30462	2.22818	2.56699	9.38859e-06	0.00057422	0.000186338
	201497_x_at	MYH11	1.47344	2.32951	1.44581	0.00519106	0.00996875	0.0440536
	201548_s_at	KDM5B	1.76656	2.67128	2.75288	0.000343571	5.00342e-05	0.000744958
	201549_x_at	KDM5B	2.20425	2.96217	2.87306	0.000338142	0.000969772	0.000134364
	202085_at	TJP2	2.12907	3.60315	4.35773	1.96474e-05	6.59945e-05	7.80771e-06
	202156_s_at	CELF2	1.01691	1.458	1.45486	0.0043378	0.0212849	0.000554237
	202252_at	RAB13	1.72868	1.50295	1.51695	0.00275719	0.000218207	0.0150704
	202315_s_at	BCR	2.10419	3.05567	2.9487	0.000117657	0.000103661	0.000156524
	202478_at	TRIB2	1.05122	1.15509	1.6023	0.00056195	0.000739337	2.90536e-05
	202651_at	LPGAT1	1.01643	1.37327	1.38493	0.000740516	0.00920717	0.000377357
	202743_at	PIK3R3	1.11221	2.12517	1.91707	0.00231823	0.00389712	4.52956e-05
	203080_s_at	BAZ2B	1.34207	1.65196	2.48411	0.00201391	0.00174309	0.00558316
	203096_s_at	RAPGEF2	1.5599	1.59125	1.58868	0.000384472	0.00371909	0.0155252
	203186_s_at	S100A4	1.56204	1.65606	1.81199	0.00137634	6.98805e-06	0.00011315
	203211_s_at	MTMR2	1.11927	1.68273	1.7198	0.000441739	0.00480875	0.0015297
	203232_s_at	ATXN1	2.15551	3.0141	4.24928	8.13865e-05	0.00188127	0.00223371
	203397_s_at	GALNT3	1.2476	2.52125	3.08214	0.00210675	0.000198087	0.00423511
	203408_s_at	SATB1	2.18338	1.56426	3.62084	0.000517018	0.00630721	1.22511e-05
	203528_at	SEMA4D	1.30261	1.8651	2.08552	0.000544026	0.000952859	0.000323227
	203588_s_at	TFDP2	1.41915	2.04224	2.64645	0.000140216	0.0020864	0.00114981
	203589_s_at	TFDP2	1.84444	2.42056	2.92819	0.00084131	0.000964572	0.00182157
	203628_at	IGF1R	1.37418	1.2521	1.13432	0.000245801	0.00439526	0.00783057
	203695_s_at	DFNA5	2.16166	1.67054	1.6098	1.92552e-05	0.00383706	0.000629244
	203765_at	GCA	1.05676	1.26292	2.55215	0.000635957	0.00205202	0.00031648
	203773_x_at	BLVRA	1.47937	2.04256	2.09411	0.00175027	0.00894476	0.000242288
	203799_at	CD302	1.54478	2.87717	3.40669	0.00814663	9.65511e-05	0.000227482
	203815_at	GSTT1	1.5511	1.69567	1.97929	4.33866e-06	1.63516e-05	8.72163e-05
	203823_at	RGS3	1.00525	1.99781	2.35675	0.000428393	0.000663039	8.50571e-06
	204154_at	CDO1	1.01854	1.13751	1.31136	0.000785734	0.017203	0.00330993
	204255_s_at	VDR	1.37202	1.64891	1.40385	9.07505e-05	0.000249024	0.00499849
	204301_at	KBTBD11	1.60921	3.4751	3.75962	0.000319562	6.0982e-05	0.000504035
	204379_s_at	FGFR3	1.45101	2.64044	3.70613	0.0258133	5.5874e-05	0.000261177
	204465_s_at	INA	1.13972	2.18725	2.0768	0.00455431	0.000934359	0.00101138
	204567_s_at	ABCG1	2.22562	2.92486	2.21134	0.000262075	0.000314724	7.87959e-06
	204612_at	PKIA	1.10248	2.10614	2.71219	0.000960823	0.00382819	0.000348165
	204912_at	IL10RA	1.17968	1.7408	2.62507	0.01623	0.00130794	0.000144278
	204961_s_at	NCF1 /// NCF1B /// NCF1C	1.07531	1.01038	1.29542	0.000629133	0.000210595	0.000740528
	205074_at	SLC22A5	1.84155	2.36104	2.1486	0.000461772	0.00103717	0.00102126
	205190_at	PLS1	1.6594	1.20463	1.52349	0.000622602	0.0168821	0.0122944
	205201_at	GLI3	1.3722	1.64772	1.61381	0.000635267	0.000555072	0.00172226
	205383_s_at	ZBTB20	1.05342	1.62331	1.80194	0.0226334	0.000255478	0.000875408
	205593_s_at	PDE9A	1.14593	1.15739	1.19611	0.00272912	0.000666514	0.0141288
	205613_at	SYT17	1.71066	1.81872	2.33964	5.93065e-05	0.000149578	1.00796e-05
	205668_at	LY75	2.29609	2.74663	4.83128	0.000361768	0.00709268	0.00247125
	205826_at	MYOM2	1.59976	2.98925	3.44796	0.00718558	0.00109362	0.0011708
	205990_s_at	WNT5A	1.21763	1.95334	2.16574	0.000249202	0.000797712	0.000433219
	206170_at	ADRB2	1.07232	2.04984	2.76138	0.00834057	0.000856584	0.0104463
	206385_s_at	ANK3	1.17587	1.27679	2.11508	1.8141e-05	0.00737001	0.00182908
	206858_s_at	HOXC6	1.31668	1.0135	1.2059	0.00730926	0.000999567	0.000114324
	207071_s_at	ACO1	1.3227	2.03321	2.24301	0.000282945	2.52907e-05	0.00328929
	207957_s_at	PRKCB	1.97996	2.37922	3.69073	0.000225293	0.00661945	0.00010193
	208650_s_at	CD24	2.03532	2.59861	2.66348	7.54599e-05	0.000541925	0.000125827
	208651_x_at	CD24	2.2997	2.4176	2.45355	0.000591855	8.26645e-05	0.00320459
	208690_s_at	PDLIM1	1.20397	1.66955	1.63526	1.96913e-05	5.35584e-05	0.000668624
	208999_at	SEPT8	2.31179	2.5002	2.43029	0.000294288	0.000163126	0.00461728
	209094_at	DDAH1	2.40943	2.76137	3.82196	0.000604309	1.44056e-05	0.00283983
	209272_at	NAB1	1.29877	1.32449	2.01736	1.05517e-06	0.0121257	0.000333602
	209442_x_at	ANK3	1.31936	1.28048	1.6958	0.000122085	0.00984962	2.3996e-05
	209498_at	CEACAM1	2.43279	3.4804	3.91864	0.00106494	3.21632e-05	0.00133612
	209590_at	BMP7	1.57664	2.09928	2.01197	0.000637802	0.000180032	0.021158
	209591_s_at	BMP7	2.25602	2.76064	3.19486	0.000215913	0.00373093	4.39574e-05
	209685_s_at	PRKCB	2.04653	2.54164	3.37537	0.000459785	9.48454e-05	3.10238e-06
	209711_at	SLC35D1	1.32762	1.50504	1.16601	0.00424553	0.00855135	0.000626932
	209771_x_at	CD24	2.59267	2.66753	2.69318	3.65103e-05	7.80505e-06	0.000598512
	209995_s_at	TCL1A	2.88984	3.46854	3.39103	0.000535002	0.00765531	0.00245237
	210136_at	MBP	1.35513	1.46265	1.71186	8.86889e-05	0.0039325	0.000638538
	210640_s_at	GPER	1.02881	2.54725	1.51509	0.0047933	4.45656e-05	0.0129151
	210644_s_at	LAIR1	1.00023	1.51523	1.15146	0.000397841	0.000165359	0.00245854
	210715_s_at	SPINT2	2.10112	2.56255	3.79651	9.70374e-06	2.88393e-05	0.000621424
	210844_x_at	CTNNA1	1.1479	1.10156	1.39964	0.000167846	0.00600657	0.000420925
	210889_s_at	FCGR2B	1.14917	1.95217	2.42646	0.0108741	2.08039e-05	0.000313403
	211202_s_at	KDM5B	1.45442	1.99023	2.34259	0.00131247	9.08213e-05	0.0100206
	211373_s_at	PSEN2	1.31678	1.76576	1.711	0.0127977	0.0017107	0.000409421
	211729_x_at	BLVRA	1.15336	1.88553	2.19544	0.00651147	0.00478469	0.00313782
	212192_at	KCTD12	1.00386	1.73964	1.78881	0.0103792	0.00217664	0.00185898
	212372_at	MYH10	1.09766	1.25107	1.84363	0.000519086	0.0061517	0.000781076
	212448_at	NEDD4L	1.1918	2.16994	2.05645	0.00142047	0.00116863	0.000579699
	212509_s_at	MXRA7	1.4338	1.59032	2.38776	0.000296528	0.00353031	4.69744e-05
	212522_at	PDE8A	1.46222	1.2644	1.47603	0.000854648	0.00981054	0.000323915
	212594_at	PDCD4	1.06714	1.42865	1.60767	0.000441262	0.00831021	0.000470605
	212765_at	CAMSAP1L1	1.37053	1.50864	1.12881	2.42431e-05	0.000537031	0.00399628
	212838_at	DNMBP	1.70004	1.92372	2.36119	9.80268e-05	6.10714e-05	2.7885e-06
	212958_x_at	PAM	1.23413	1.43171	2.14055	0.00379951	0.0039668	0.00168038
	213198_at	ACVR1B	1.22621	1.8345	1.39676	0.00514125	0.00031596	0.0025217
	213280_at	RAP1GAP2	1.85333	3.18635	2.15472	0.000790633	0.000651257	0.00895621
	213437_at	RUFY3	1.01794	1.1468	1.48846	0.000178861	0.00355769	0.00825842
	213552_at	GLCE	1.14069	1.35571	1.55774	0.000302336	0.004272	0.00214691
	213629_x_at	MT1F	1.59192	2.28003	1.89519	7.70077e-05	0.00493665	0.000720123
	213792_s_at	INSR	1.26904	1.60957	1.38804	0.00226854	0.000622166	0.00220342
	213793_s_at	HOMER1	1.42768	1.39773	1.64348	0.00170745	0.00242656	0.000893327
	213939_s_at	RUFY3	1.66736	1.6539	2.43187	0.00113905	0.0086685	0.00183017
	214239_x_at	PCGF2	1.08	1.64756	1.33624	0.0029539	0.00109031	0.000716205
	214722_at	NOTCH2NL	1.18332	1.20234	1.51519	0.000441999	0.0304006	2.32085e-05
	214933_at	CACNA1A	1.14872	1.50016	1.81649	0.00198467	0.00380656	0.000194545
	215001_s_at	GLUL	1.98937	2.92053	2.75491	0.000453502	3.52659e-05	0.00681646
	215440_s_at	BEX4	1.52777	1.66074	2.09487	0.0277552	0.00304101	0.00368902
	215813_s_at	PTGS1	1.18926	2.22466	2.15788	0.00129514	7.32384e-05	0.00145937
	216379_x_at	CD24	2.48905	2.68892	2.86918	5.94407e-05	0.000460301	0.000634604
	217728_at	S100A6	1.4911	1.57849	1.49518	3.67036e-05	9.10444e-05	0.0267921
	217975_at	WBP5	1.74726	2.4489	2.58311	5.96257e-05	0.000656495	0.00685032
	218149_s_at	ZNF395	1.14642	1.1522	1.68972	2.20142e-05	0.00466676	1.31538e-05
	218164_at	SPATA20	1.22896	1.22906	1.73295	9.32449e-05	0.00157632	0.000297211
	218242_s_at	SUV420H1	1.63989	1.96402	1.56421	1.09589e-06	0.00116683	0.000223757
	218259_at	MKL2	1.25231	2.35445	1.43976	0.00315821	0.00436984	0.00108699
	218311_at	MAP4K3	1.29784	1.45747	1.69115	0.000368277	0.00568961	0.000761132
	218532_s_at	FAM134B	1.02209	2.4843	3.1477	0.0143517	0.000272101	0.0138094
	218543_s_at	PARP12	1.62734	3.13135	2.88855	0.00237292	0.000491813	0.000211927
	218773_s_at	MSRB2	1.69271	2.55534	3.25706	3.86665e-05	0.000259291	2.06927e-06
	218935_at	EHD3	2.03648	3.65479	3.4323	0.00113705	9.46219e-07	4.4852e-05
	218974_at	SOBP	1.25218	1.52239	1.52193	1.53663e-05	0.00232462	0.00248321
	218976_at	DNAJC12	1.11905	3.20035	3.53987	0.00648724	0.000189053	0.000121914
	219036_at	CEP70	1.4844	1.74138	1.93989	0.00038289	0.00671572	0.00241285
	219451_at	MSRB2	1.19615	1.64458	1.82417	0.00277519	0.000483154	0.000644337
	219471_at	C13orf18	2.09317	2.42112	3.43068	3.78791e-06	0.00450048	0.00138714
	219489_s_at	NXN	1.28088	2.27037	2.45197	0.00390028	3.17933e-05	0.000312013
	219563_at	C14orf139	1.05685	1.59214	1.51602	0.00246556	3.32898e-05	2.70341e-05
	219632_s_at	TRPV1	1.07851	1.03944	1.37715	0.0173395	0.00637195	0.00791662
	219648_at	MREG	2.06942	2.75429	2.44265	8.80704e-05	0.00179249	0.00737399
	219938_s_at	PSTPIP2	1.14194	1.402	1.62554	0.00256035	0.000723553	0.0307918
	220041_at	PIGZ	1.14935	1.10137	1.70272	0.00330793	0.0052145	0.00330668
	220338_at	RALGPS2	1.522	1.64614	1.25677	0.00142242	0.0119907	0.00214977
	221210_s_at	NPL	1.03706	1.13393	1.09337	0.0214554	0.00492225	0.00174698
	221676_s_at	CORO1C	1.1291	1.26137	1.77964	0.00421547	0.000705566	8.81652e-05
	222234_s_at	DBNDD1	1.92345	2.80685	2.49787	0.00555577	0.00398232	0.0223847
	222336_at	C4orf34	2.06633	1.47073	1.01289	0.00131264	0.0422664	0.00243984
	222423_at	NDFIP1	1.02935	1.58619	1.55663	0.00340774	2.34278e-05	0.00138441
	222450_at	PMEPA1	1.1479	1.78825	1.32921	0.00484307	5.65861e-05	2.46092e-05
	222566_at	SUV420H1	1.23336	1.76861	1.01427	0.000610194	0.00259759	0.00304792
	222761_at	BIVM	1.11347	1.09328	1.29876	0.0306748	0.00278551	0.000144377
	222939_s_at	SLC16A10	1.41996	1.51584	1.92583	0.000724256	0.000715099	0.0012562
	223000_s_at	F11R	1.11212	1.54516	3.0069	0.000171845	0.00974554	0.000615789
	223103_at	STARD10	1.03206	1.14682	1.05137	0.0356515	0.00581919	0.00640159
	223340_at	ATL1	1.25576	1.53382	2.11541	0.035319	0.000939985	0.00905698
	223423_at	GPR160	1.16518	1.78651	2.15127	0.00946432	0.000284318	0.000382605
	223500_at	CPLX1	1.29433	1.62208	1.25126	0.000565908	0.00101699	0.00115491
	223530_at	TDRKH	1.00695	1.33986	1.93885	0.000366502	5.77766e-05	0.00654771
	223823_at	KCNMB2	1.19811	1.38947	2.23075	0.0235991	0.0114898	0.0110235
	224150_s_at	CEP70	1.15872	1.194	2.21627	0.00652284	0.00257813	0.00201134
	224367_at	BEX2	1.30713	1.86571	3.09575	9.60831e-05	9.24341e-05	0.00267529
	224553_s_at	TNFRSF18	1.24323	2.21339	1.97371	0.00825779	1.55823e-05	0.000354707
	224772_at	NAV1	1.61733	2.05215	1.96034	0.000144897	5.08116e-05	7.64724e-05
	224773_at	NAV1	1.56405	1.9527	1.80363	0.000246931	0.00020323	0.00224938
	224793_s_at	TGFBR1	1.46613	1.91853	2.22621	0.00285558	0.00231166	0.000116527
	225327_at	KIAA1370	1.11415	1.65537	1.98199	0.000664657	0.000603561	5.45251e-05
	225330_at	IGF1R	1.20981	1.05347	1.67843	0.000354875	0.0235184	0.00160068
	225368_at	HIPK2	1.61592	2.57513	2.38826	0.00232918	8.06193e-05	0.0103882
	225604_s_at	GLIPR2	1.00111	1.19087	1.06518	0.000695801	0.000845717	0.0312297
	225728_at	SORBS2	1.0952	1.46734	2.48933	0.00287481	0.00133405	0.00199604
	225809_at	PARM1	1.3603	1.92844	2.99952	0.00161578	1.87452e-05	2.44337e-05
	226018_at	C7orf41	1.6492	2.30091	3.00574	7.86052e-06	0.000102703	8.56218e-05
	226039_at	MGAT4A	1.56468	1.83659	2.33833	0.00337813	0.000602154	5.69851e-05
	226101_at	PRKCE	1.22498	2.71371	2.3727	0.00310883	0.000160658	0.000401551
	226157_at	TFDP2	2.32398	3.44014	4.30707	0.000693526	0.00318814	2.53017e-06
	226189_at	ITGB8	2.63584	2.76654	3.25218	0.00294369	0.00948065	0.000244486
	226190_at	MAP3K13	1.69825	2.66769	2.67395	0.000471234	7.19938e-06	0.000938336
	226272_at	RCAN3	1.39353	1.53668	1.88349	1.27795e-05	0.00680822	9.02488e-05
	226352_at	JMY	2.77832	4.17788	4.42059	0.0014357	0.000855851	0.000250738
	226382_at	CAMK1D /// LOC283070	1.55155	3.38924	3.934	0.0266748	1.08851e-06	2.68727e-06
	226530_at	BMF	1.6719	1.17945	1.37023	0.000602595	0.00288925	0.00388071
	226602_s_at	BCR	1.4685	1.89591	1.91624	0.000420974	0.00116922	6.46251e-05
	226657_at	C17orf103	1.52702	1.80105	2.21927	0.000269323	0.00277545	0.000225523
	226682_at	RORA	2.07768	2.10608	2.23954	0.00606156	0.00088288	0.00606947
	226683_at	SNX18	1.02887	1.60125	1.3153	0.0131638	0.0179339	0.00386296
	226733_at	PFKFB2	1.34994	2.37878	2.14391	0.0126762	9.89995e-05	0.00671779
	226811_at	FAM46C	1.33929	2.17421	2.88172	0.000354658	1.48035e-05	0.000197843
	226864_at	PKIA	1.67752	2.73933	2.77447	0.000577829	6.49341e-06	0.00019973
	227182_at	SUSD3	1.16246	1.28739	1.57849	0.0103366	0.00448337	0.000337101
	227198_at	AFF3	2.83096	2.72831	2.89284	4.96674e-05	0.000285293	0.00142199
	227272_at	C15orf52	1.23393	1.37283	1.69353	0.000290604	0.00652626	9.72413e-05
	227370_at	FAM171B	1.73839	1.93372	2.31133	0.0153846	0.000233372	0.00311209
	227376_at	GLI3	1.70504	2.0082	1.78693	0.000339291	0.00130414	0.00141507
	227383_at	LOC727820	1.3891	1.22887	1.37773	0.00130019	0.0229043	7.66972e-05
	227384_s_at	LOC727820	1.51297	1.42333	1.4425	0.00123281	0.0177151	0.0011569
	227499_at	FZD3	1.14039	1.38002	1.27429	0.000676832	0.00603364	0.0312778
	227524_at	FZD3	1.59969	1.26447	1.23496	0.00136415	0.0127452	0.0121035
	227719_at	SMAD9	1.00072	2.2123	2.96974	0.000460454	0.00143374	0.00171256
	227792_at	ITPRIPL2	2.37785	1.40972	2.23821	6.71637e-05	0.0125271	5.4939e-05
	227817_at	PRKCB	1.40765	1.80792	1.52054	0.0105266	0.00848941	0.001581
	227909_at	NCRNA00086 /// NCRNA00087	1.04774	1.7353	1.08632	0.000281521	0.000139533	0.000419709
	228035_at	STK33	1.03727	1.21464	1.25943	0.000800036	0.00375494	0.000901033
	228044_at	SERP2	1.1232	1.33918	1.40167	0.010515	0.0176754	0.00301934
	228097_at	MYLIP	1.37536	1.36328	1.08871	0.000957096	0.0054088	0.00109334
	228098_s_at	MYLIP	1.37344	1.34527	1.59459	5.83647e-05	0.00667153	0.00149343
	228153_at	RNF144B	1.05058	1.5899	1.706	0.000307261	0.000187712	0.000257243
	228372_at	C10orf128	1.72464	1.48425	1.64476	0.00339899	0.0075452	0.000605387
	228427_at	FBXO16	1.12726	1.56278	1.98417	0.00291355	0.000188837	0.0063152
	228891_at	SEMA4D	1.92407	2.89332	2.74552	0.000224194	0.00163505	0.000200762
	228909_at	LOC642852	1.05792	1.61565	1.38303	0.00396765	0.000139605	0.00305438
	228918_at	LOC100288617	1.23999	1.35487	1.14534	3.9914e-06	5.14071e-05	0.000361112
	228973_at	DLG2	1.33157	3.25851	3.41212	0.00663046	0.00123041	0.000216176
	229019_at	ZNF385B	1.08438	1.68038	2.36476	0.00624653	2.53137e-05	0.00068534
	229053_at	SYT17	1.84788	1.99109	3.38882	1.75392e-05	0.000171321	0.00119802
	229170_s_at	TTC18	1.37279	1.88674	2.76377	0.00640945	0.000273554	0.000511759
	229390_at	FAM26F	1.62127	2.51107	2.65947	0.000952111	0.000720999	0.00747072
	230100_x_at	PAK1	1.05633	1.58544	1.6132	0.00326097	0.00216961	0.00542592
	230128_at	IGL@	1.7837	2.1237	1.95824	0.000924439	5.95243e-05	0.000645086
	230183_at	EXT1	1.29815	2.17056	2.8425	0.00435539	0.00254053	7.35252e-05
	230244_at	C2orf82	1.04317	4.84672	5.2011	0.033046	8.8818e-06	0.00372907
	230526_at	LOC100131096	1.27479	1.28348	1.4547	0.00327751	0.0114984	8.48363e-05
	230560_at	STXBP6	1.42417	3.27674	3.19408	0.00494666	5.53632e-05	6.41518e-05
	230779_at	TNRC6B	1.31469	1.25028	1.33381	0.000519753	0.0430908	0.00137767
	231093_at	FCRL3	2.11329	2.71695	3.34117	7.40578e-06	0.0015113	4.74426e-05
	231323_at	PSMB2	1.4774	1.01875	1.03213	0.000192656	0.00295012	0.00336969
	232639_at	C3orf25	1.22975	3.22233	3.72074	0.000119067	3.78846e-05	0.000258798
	232693_s_at	FBXO16 /// ZNF395	1.04738	1.04868	1.37794	1.3152e-05	0.00335775	3.09596e-05
	235051_at	CCDC50	1.45616	1.0295	1.64813	0.0298852	0.0342267	0.00638879
	235122_at	HIVEP3	1.31336	2.45738	2.24904	0.00052674	3.25642e-05	0.0047605
	235299_at	SLC41A2	1.07104	1.85672	1.57711	0.00279813	0.00143932	0.0065628
	235570_at	RBMS3	1.05761	1.4989	1.91543	0.0492136	0.00271994	0.0311431
	235736_at	LOC100287482	1.61813	3.06648	2.36032	0.00139134	0.00187947	0.000187285
	235798_at	TMEM170B	1.56506	2.20865	2.1216	3.87456e-05	0.000745006	0.00229387
	235911_at	MFI2	1.74325	1.17254	1.57561	0.00199066	0.00205103	0.000637199
	236302_at	PPM1E	1.5833	1.62076	1.94839	0.000158363	0.00280698	0.000150338
	236831_at	CCDC50	1.65795	1.21922	1.87331	0.001822	0.0299517	0.000397729
	238520_at	TRERF1	1.42408	1.84956	1.49569	0.000335129	0.00462735	0.00135779
	238649_at	PITPNC1	1.018	1.98838	1.79384	0.00572751	0.000377548	0.00180592
	238669_at	PTGS1	1.09012	2.39407	2.36472	0.0182344	0.00126783	0.0010101
	238893_at	LOC338758	1.55284	1.20806	2.05476	0.00296939	0.0021177	0.000160578
	239005_at	FLJ39739	1.14486	1.36239	1.22766	0.0490285	0.0327038	0.00205341
	239062_at	LOC100131096	1.46372	1.22914	1.35845	0.00987722	0.0180716	0.0336983
	242268_at	CELF2	1.63968	1.58364	1.92007	0.00857375	0.0278376	1.00162e-05
	242344_at	GABRB2	1.37896	2.20955	2.56225	0.00801558	1.32489e-05	0.00779691
	242794_at	MAML3	1.25912	2.15213	1.69931	0.00103805	0.00395404	0.000196513
	244008_at	PARP8	1.27225	2.23156	2.1998	0.000514662	0.00424386	0.0118872
	244043_at	TFDP2	1.08234	2.20057	1.99058	0.0023558	0.00584467	3.93624e-06
	266_s_at	CD24	2.49179	2.83181	2.84361	3.62257e-05	7.44609e-05	1.61464e-06
	34406_at	PACS2	1.07649	1.86455	1.52711	0.000445031	0.00173868	8.94683e-06
	39318_at	TCL1A	3.24456	3.98363	4.01215	0.000342964	0.000703232	3.81742e-05
	44790_s_at	C13orf18	2.49233	2.6606	4.14801	0.000196791	8.56121e-05	4.20592e-05
	47550_at	LZTS1	1.19448	1.00777	1.42842	0.00934206	0.0292971	0.0225358
F	1553678_a_at	ITGB1								1.2907	1.8453	1.40597	0.0109496	0.010955	0.00107383
	1557961_s_at	LOC100127983								1.12227	1.19702	1.21388	0.00043639	0.0425439	0.0259187
	1558115_at	RECK								1.12923	1.31135	1.15634	0.0464738	0.0050345	0.0211084
	1568604_a_at	CADPS								1.21393	1.51431	1.80125	0.0040178	0.00275656	5.65955e-05
	200621_at	CSRP1								1.31189	1.29536	1.65285	0.0457768	0.00113092	0.000205395
	200972_at	TSPAN3								1.025	1.31186	1.58699	0.00245935	0.00372645	0.000606132
	200985_s_at	CD59								1.78061	1.72432	1.22298	0.0336664	0.00112815	0.005223
	201022_s_at	DSTN								1.28277	1.60781	1.37321	0.0146491	0.000513717	6.51349e-05
	201242_s_at	ATP1B1								1.51416	1.37589	1.61803	0.000715229	0.00263033	0.00113512
	201470_at	GSTO1								1.2576	1.51431	1.0521	0.00494035	0.00032686	0.00563316
	201578_at	PODXL								1.14608	1.11592	1.60625	0.00652146	0.00885823	0.000147514
	201670_s_at	MARCKS								1.45761	1.95814	1.89005	0.00955535	0.00532933	0.000564401
	201876_at	PON2								1.15249	1.72369	2.109	0.00198004	0.0018063	0.00137961
	201963_at	ACSL1								1.59565	1.91256	1.84037	0.0173574	3.95384e-05	0.000525616
	202599_s_at	NRIP1								2.0963	2.6421	2.40299	0.0088628	0.00333136	0.00500951
	202600_s_at	NRIP1								1.77217	2.09922	3.43007	0.00197599	4.57134e-05	0.000254875
	202887_s_at	DDIT4								1.18684	2.68834	3.06388	0.00478977	5.66396e-06	0.000117439
	203688_at	PKD2								1.04563	1.06835	1.77732	0.00303642	0.00763139	0.0252922
	203837_at	MAP3K5								1.46763	1.84449	1.45929	0.0419564	0.000303301	0.00985675
	203964_at	NMI								1.52577	1.72301	1.07629	0.0190258	0.000287043	0.00118957
	204342_at	SLC25A24								1.48101	1.82502	1.15994	0.0316386	7.09357e-05	0.0113558
	204348_s_at	AK3L1								1.37243	1.47016	1.3992	0.00664646	1.60542e-05	0.000953139
	204672_s_at	ANKRD6								1.3048	1.11505	1.74312	0.035341	0.00155193	0.000693185
	205081_at	CRIP1								1.21521	1.48184	1.17532	0.0173888	0.000532074	0.00110461
	207275_s_at	ACSL1								1.34159	1.37179	1.1842	0.0122049	0.00463485	0.0156357
	208636_at	ACTN1								1.64754	1.66557	1.59312	0.000758551	2.06916e-05	0.000992046
	208937_s_at	ID1								1.64495	1.9499	1.65517	0.0244252	0.000377917	0.000634028
	208949_s_at	LGALS3								1.02729	1.57369	1.71641	0.0266611	0.00163185	0.00235875
	209238_at	STX3								1.11659	1.10689	1.47488	0.0496048	0.00433893	0.0119148
	209318_x_at	PLAGL1								1.22669	1.50616	2.63685	0.0176917	0.0018707	8.50794e-06
	209781_s_at	KHDRBS3								1.14039	1.19291	1.56412	0.0253715	0.00539093	0.000121816
	210445_at	FABP6								1.17145	1.20965	1.18748	0.0239477	0.00307646	0.000319653
	210830_s_at	PON2								1.15304	1.5637	1.57651	0.00432537	0.000631983	0.00067776
	211945_s_at	ITGB1								1.50617	1.91425	2.25637	0.0236398	0.00233183	0.00198736
	212124_at	ZMIZ1								1.59609	2.25484	2.59475	0.00293436	0.000173207	9.96875e-05
	212136_at	ATP2B4								1.17267	1.74189	2.06443	0.00488232	0.00151796	0.00102353
	212254_s_at	DST								1.13496	2.12075	3.76412	0.00310992	0.00648039	0.00186091
	212347_x_at	MXD4								1.03988	1.70388	1.81673	0.0409285	0.000355634	0.000956979
	212386_at	TCF4								1.39179	2.14112	3.44067	0.000136828	0.00173627	9.37454e-06
	212397_at	RDX								1.25305	1.56083	1.21663	0.00911547	0.000710558	0.00196901
	212828_at	SYNJ2								1.31804	1.03483	1.14437	0.0272723	0.00640876	0.00108954
	212841_s_at	PPFIBP2								1.20929	1.44618	1.85744	0.0103108	0.00156068	0.00152047
	213308_at	SHANK2								1.44117	1.33384	2.7233	0.0394226	0.0225107	1.68016e-06
	214039_s_at	LAPTM4B								1.40188	1.86126	1.86542	0.0142028	0.000522789	0.000287448
	214295_at	KIAA0485								1.27311	1.28318	2.56378	0.0188234	0.000936965	0.000272547
	215321_at	RUNDC3B								1.42592	1.43353	1.98434	0.00113477	0.00107352	0.00367916
	217788_s_at	GALNT2								1.08058	1.11669	1.69742	0.0455656	0.00647028	0.0028351
	217911_s_at	BAG3								1.31349	1.16454	1.30319	0.0245509	0.00160001	0.00441137
	217995_at	SQRDL								1.14945	1.36473	1.32869	0.0166545	0.00274584	0.00795095
	218820_at	C14orf132								1.4085	1.53667	2.03834	0.0261971	0.0015369	0.00114299
	218847_at	IGF2BP2								1.03536	1.23384	1.78836	0.00059467	0.0180403	2.0568e-05
	219038_at	MORC4								1.32833	1.4623	1.7769	0.00122049	0.00753506	0.000334823
	219637_at	ARMC9								1.08058	1.17976	1.46611	0.0446173	0.000182905	0.000170597
	221571_at	TRAF3								1.0055	1.4068	1.74123	0.0422742	2.20699e-05	0.00239892
	221773_at	ELK3								1.53733	2.46056	3.65474	0.00737537	0.00234466	0.000146522
	222482_at	SSBP3								1.46467	1.24882	1.73137	0.0189859	0.000274223	0.00115897
	222857_s_at	KCNMB4								1.00686	1.72837	2.0233	0.00866904	0.000591628	1.38867e-05
	224435_at	C10orf58								1.26218	1.19258	1.39024	0.0349605	0.00244598	0.00156777
	225018_at	SPIRE1								1.02117	1.3318	1.99175	0.00498975	0.0022885	0.000533173
	225060_at	LRP11								1.72158	1.62776	1.02571	0.0184139	0.00135145	0.0244597
	225342_at	AK3L1								1.28233	1.58591	1.84535	0.0107295	0.00380785	0.00043562
	225447_at	GPD2								1.34927	1.25507	1.45547	0.0183863	0.00130426	0.00705425
	225540_at	MAP2								1.04457	1.59108	1.34465	0.0303369	0.00863245	0.00488409
	225602_at	GLIPR2								1.08913	1.05722	1.34093	0.0450649	0.00735349	0.00188791
	225706_at	GLCCI1								1.19626	1.56762	2.77708	0.0170208	9.87777e-05	0.000479306
	225897_at	MARCKS								1.74752	2.13645	1.23382	0.0157622	0.00025897	0.0116036
	226137_at	ZFHX3								1.02094	1.66036	2.31346	0.00854588	0.00102919	0.000139036
	226143_at	RAI1								2.12705	3.09911	3.9089	0.016324	4.63344e-06	3.79356e-06
	226169_at	SBF2								1.21908	1.55483	2.39389	0.0182485	0.000177815	0.00412093
	226360_at	ZNRF3								1.13508	1.0061	1.05583	0.00159762	0.00358671	0.00253842
	226702_at	CMPK2								1.6743	1.86645	1.4223	0.0455078	0.00461985	0.00327963
	226925_at	ACPL2								1.76433	1.6481	1.50409	0.0358611	4.10987e-05	0.00538915
	227180_at	ELOVL7								1.27393	1.3431	1.00117	0.0373977	8.22961e-05	0.00456636
	227298_at	FLJ37798								1.01568	1.16137	1.28682	0.0108914	0.00983596	0.00043167
	227525_at	GLCCI1								1.26974	1.75451	2.67418	0.0313814	2.39941e-05	7.24398e-05
	227947_at	PHACTR2								1.21634	1.81786	1.26539	0.0086483	0.00123513	0.00192206
	228155_at	C10orf58								1.03755	1.31081	1.20583	0.00816303	0.00370949	0.00045192
	229963_at	BEX5								1.32605	1.96728	1.55666	0.00541997	0.00116094	0.00210342
	234994_at	TMEM200A								1.73315	5.25098	5.59854	0.0186677	0.000171506	0.00212711
	235056_at	ETV6								1.13214	1.48125	1.91783	0.00716887	6.57496e-06	0.00122565
	235208_at	CCDC112								1.03615	1.10442	1.26783	0.00160561	0.00854592	0.0266675
	235650_at	CDHR3								1.08997	2.40684	3.09581	0.0208957	0.000968785	0.00322146
	244774_at	PHACTR2								1.01095	1.7476	2.06274	0.00199895	0.000146977	7.89976e-05
G	1552701_a_at	CARD16															1.33157	2.00667	1.88133	0.00272403	0.0169186	0.00133655
	1552703_s_at	CARD16 /// CASP1															1.63494	2.47434	1.8302	0.00483425	0.0171767	0.000638153
	1557411_s_at	SLC25A43															2.0079	1.99542	1.91192	0.000232575	0.000195877	0.000244252
	1565149_at	DYNC2H1															1.08274	1.68945	2.56566	0.00875678	0.00106407	0.000994027
	1569940_at	SLC6A16															1.15844	1.12822	1.25764	0.040478	0.00926864	0.000461918
	200923_at	LGALS3BP															1.45651	2.47302	2.32425	3.90854e-05	4.35434e-05	0.000173136
	201034_at	ADD3															1.23122	1.91972	2.70334	0.000682848	0.000386495	0.0011933
	201310_s_at	C5orf13															1.82809	1.83755	2.70129	7.57363e-05	0.000973016	0.000236615
	201566_x_at	ID2															1.08324	2.26354	1.94115	0.0063038	0.00298219	0.000278443
	201753_s_at	ADD3															1.40672	2.16926	2.78454	0.00116434	0.000920701	1.8886e-05
	201859_at	SRGN															1.79068	1.91345	1.80614	0.00131381	0.0110944	0.000475939
	201924_at	AFF1															1.35632	2.12646	4.15906	0.000669888	0.000623823	0.000412852
	202351_at	ITGAV															1.01178	1.11931	1.47088	0.00101942	0.0084868	0.00025725
	202411_at	IFI27															2.54797	4.62281	4.45497	0.00327117	0.000898344	5.33422e-05
	202430_s_at	PLSCR1															1.20375	1.63282	1.2973	0.00154238	0.000618528	0.00744509
	202733_at	P4HA2															1.65656	3.67451	4.03395	0.00179024	0.000165782	4.62779e-05
	202935_s_at	SOX9															1.99784	2.46328	2.26309	0.000446115	2.25038e-05	0.000101866
	202936_s_at	SOX9															1.66639	1.88595	2.13471	0.00516288	0.0013785	0.000142414
	203020_at	RABGAP1L															1.22552	2.00371	2.70567	0.000254044	0.000485237	0.000854924
	203029_s_at	PTPRN2															1.07255	2.54215	1.89753	0.0174872	0.00132369	0.0251099
	203153_at	IFIT1															1.66274	1.94195	1.41377	0.000314285	0.00904141	0.00296661
	203595_s_at	IFIT5															1.26463	1.9864	2.15341	0.00441559	0.0168276	0.000173793
	203596_s_at	IFIT5															1.11986	1.96506	2.12399	0.0137551	5.65691e-05	0.000119777
	203640_at	MBNL2															1.28246	1.72018	2.64289	0.000153248	5.68198e-05	0.00160498
	203706_s_at	FZD7															1.01999	1.15345	1.09544	0.00585503	0.00641255	0.0126058
	203725_at	GADD45A															1.18352	2.6832	3.38864	0.00279374	5.62312e-05	1.77613e-05
	203758_at	CTSO															1.12218	2.7131	1.52375	0.00886653	0.00350707	2.57264e-05
	204135_at	FILIP1L															1.27734	1.7801	1.66255	0.000167279	0.00286533	0.00016877
	204430_s_at	SLC2A5															1.35465	2.66444	3.1116	0.000356433	0.000388652	0.000965397
	204439_at	IFI44L															1.80072	2.71193	2.99423	0.000658707	0.000141301	0.00034192
	204747_at	IFIT3															1.49422	2.0067	2.04773	8.90358e-05	0.000112477	0.000234393
	204971_at	CSTA															1.08828	1.93807	1.88812	0.00647078	0.0236903	0.000113739
	204972_at	OAS2															1.22282	1.55224	1.14698	0.000506362	0.000131864	0.0236585
	204994_at	MX2															1.70287	2.39918	2.52186	3.66317e-05	0.000389091	1.16191e-05
	205022_s_at	FOXN3															1.28093	1.008	2.23572	0.000262048	0.0298206	0.000778177
	205153_s_at	CD40															1.05297	2.5585	3.80165	0.00389527	0.000249263	0.000712576
	205660_at	OASL															1.93209	2.6586	2.16211	0.000154137	0.00212448	0.000649499
	205686_s_at	CD86															1.20098	1.80045	1.8574	0.00310352	0.00327714	0.000136807
	205830_at	CLGN															1.61694	1.76084	2.49145	0.001024	0.0390682	0.000355822
	205882_x_at	ADD3															1.00777	1.70833	2.37115	9.79576e-05	0.00406566	0.000299315
	206082_at	HCP5															1.33603	2.89548	3.65913	2.6013e-05	3.94699e-06	0.000303441
	206133_at	XAF1															1.698	2.54021	3.10587	0.00161809	0.00221537	7.0508e-05
	206332_s_at	IFI16															1.19161	1.80196	1.47763	0.00281339	0.000210974	0.000251787
	206662_at	GLRX															1.06774	2.02866	2.05587	0.000165163	0.00369159	0.00118813
	207826_s_at	ID3															1.1156	2.86646	3.16029	0.00689943	0.000397765	0.000752766
	208966_x_at	IFI16															1.12157	1.72458	1.57368	1.1785e-05	5.54308e-05	7.41716e-05
	208981_at	PECAM1															1.58297	2.94548	3.10712	0.00729017	0.000681297	6.1851e-05
	208982_at	PECAM1															1.78827	2.95277	3.72223	2.69507e-05	0.000245695	3.4282e-05
	209201_x_at	CXCR4															1.15	1.71045	2.99979	0.00171895	0.00160122	0.000443498
	209276_s_at	GLRX															1.34209	1.9622	2.10292	0.00144281	0.00394062	0.000625218
	209417_s_at	IFI35															1.00195	2.02984	1.74438	0.000274015	0.00172842	0.00273534
	209684_at	RIN2															1.92217	3.91209	3.30663	0.0167848	4.69744e-05	3.56251e-05
	210198_s_at	PLP1															1.18159	3.67989	2.41772	0.00383467	0.00140867	2.96447e-05
	210797_s_at	OASL															1.82231	2.71804	2.17436	0.00115329	0.00294109	0.00471684
	211368_s_at	CASP1															1.46058	3.20864	2.24891	0.00193912	0.010649	7.89761e-05
	212190_at	SERPINE2															1.31436	1.88058	1.8218	0.000159059	0.00330389	0.00712364
	212195_at	IL6ST															1.00312	1.46119	1.80882	0.00450357	0.00743835	0.000782764
	212458_at	SPRED2															1.05715	1.69613	2.24089	0.00130443	0.00330471	0.000417899
	213093_at	PRKCA															1.43854	1.20883	1.43047	0.000732092	0.00015952	0.000128605
	213212_x_at	GOLGA6L5 /// GOLGA6L9															1.46648	1.47692	2.02098	0.00125781	0.000609889	2.16123e-05
	213248_at	LOC730101															1.03588	1.54404	1.26683	4.3726e-05	0.00700443	0.000414531
	213797_at	RSAD2															1.61652	3.31551	3.28989	0.00369255	6.52969e-05	2.43382e-06
	213982_s_at	RABGAP1L															1.279	1.8819	1.98541	5.2095e-05	0.00849654	0.000448204
	214059_at	IFI44															1.78454	2.34206	2.39527	7.2636e-05	0.000130095	2.9584e-06
	214290_s_at	HIST2H2AA3 /// HIST2H2AA4															1.06737	2.38051	2.70279	0.0004704	0.000434864	7.07168e-06
	214453_s_at	IFI44															1.01223	1.1365	1.59195	0.00269391	0.00218238	2.38996e-05
	214719_at	SLC46A3															1.31196	1.70219	2.55698	0.0237346	0.0110492	2.39752e-05
	215058_at	DENND5B															1.1788	2.20884	2.15596	0.00023755	0.000118034	0.000715609
	215071_s_at	HIST1H2AC															1.29427	3.85036	4.56728	0.00282845	0.000633263	0.000502957
	217028_at	CXCR4															1.54131	2.84162	5.73353	0.001888	0.000255903	1.14595e-05
	217502_at	IFIT2															1.21447	2.44956	1.14923	0.00672612	0.00245693	0.00137413
	217783_s_at	YPEL5															1.01136	2.16468	3.17795	0.00195426	0.00374572	0.000586397
	218025_s_at	PECI															1.63984	1.72544	1.41921	0.0025647	0.00592597	0.000134407
	218280_x_at	HIST2H2AA3 /// HIST2H2AA4															1.08502	2.3733	2.6673	0.000395675	0.000210105	2.22566e-06
	218400_at	OAS3															1.12578	1.29022	1.22853	0.000777732	0.000332547	0.00336265
	218450_at	HEBP1															1.16781	1.54876	1.29712	0.00670971	0.00448352	0.0211238
	218986_s_at	DDX60															1.04315	1.42284	1.70378	0.00194923	0.00467402	0.00264715
	219209_at	IFIH1															2.70606	4.2338	4.11748	4.76786e-06	0.000343282	0.000277237
	219211_at	USP18															1.42917	2.18191	1.95211	0.00403379	5.63337e-05	1.24231e-05
	219230_at	TMEM100															1.35184	2.93897	3.18272	0.00382841	0.000267134	0.000354067
	219352_at	HERC6															1.32683	2.28023	2.44358	0.000516464	0.000129174	5.24961e-07
	219684_at	RTP4															1.29227	2.49206	1.9219	0.000341935	0.00425433	0.0112054
	219734_at	SIDT1															1.00982	1.74813	1.74901	0.00731416	0.000146622	0.000811349
	220146_at	TLR7															1.1416	2.49878	3.05699	0.00567862	0.00242951	3.47196e-05
	220595_at	PDZRN4															1.21091	2.02643	1.54853	0.00569185	0.00200738	0.00184527
	222494_at	FOXN3															1.13453	1.00202	1.77239	0.0161045	0.020373	0.0011675
	222717_at	SDPR															1.15731	2.55503	2.03259	0.00579708	0.00399408	0.000906347
	223405_at	NPL															1.05451	1.48793	1.8022	0.00061694	0.00101309	0.000548466
	224831_at	CPEB4															1.74084	2.70352	3.30877	0.000166044	0.00205113	0.0001963
	225144_at	BMPR2															1.21191	1.57258	1.93665	0.00240013	0.000313842	0.0013593
	225570_at	SLC41A1															1.45686	2.2864	3.03032	0.00190478	2.36366e-05	4.24017e-06
	225800_at	JAZF1															1.26697	1.36919	1.46146	0.020927	0.0177182	0.000455716
	225929_s_at	RNF213															1.38252	2.36879	3.55435	0.00290025	0.0012739	0.000173799
	225931_s_at	RNF213															1.43715	2.28621	2.61511	0.000145982	9.48644e-05	0.001546
	226603_at	SAMD9L															1.08955	1.94283	2.193	0.000629852	0.000173521	0.000226492
	226694_at	AKAP2 /// PALM2-AKAP2															1.17492	1.35911	1.89144	0.00200933	6.55967e-05	1.97698e-06
	226757_at	IFIT2															1.89006	2.85662	2.91952	0.00020247	0.00174192	0.000297444
	226818_at	MPEG1															1.29864	2.6807	3.64378	0.00326991	3.73345e-05	6.03641e-05
	226841_at	MPEG1															1.33473	2.72042	4.48324	0.00772435	0.000160651	5.08468e-06
	227189_at	CPNE5															1.00148	1.96828	2.734	0.00320411	0.000309243	0.0023122
	227239_at	FAM126A															1.02988	1.26481	1.8153	0.00285293	0.00578324	0.00043581
	227481_at	CNKSR3															2.1541	3.95007	2.48709	0.0195193	0.000339764	1.73904e-05
	227930_at	EIF2C4															1.28473	1.51345	2.45923	0.00135866	0.0001011	1.52189e-05
	228152_s_at	DDX60L															1.46658	2.05823	2.0465	0.00023103	0.000484294	9.27006e-05
	228551_at	DENND5B															1.63316	2.46151	3.30645	0.003284	6.87701e-06	2.98038e-05
	228617_at	XAF1															2.16717	2.77662	2.85132	0.000901695	0.000261563	1.45725e-05
	228656_at	PROX1															1.18848	1.97187	2.20501	0.00556573	0.00185434	0.000492451
	228964_at	PRDM1															1.99257	3.34602	2.85068	0.000124543	9.75948e-05	8.66893e-06
	229147_at	RASSF6															1.12761	1.94557	2.98453	8.12162e-05	0.000234074	6.08538e-05
	229310_at	KLHL29															1.22419	1.87893	2.07455	0.000278031	0.0024401	3.17848e-05
	229450_at	IFIT3															1.46417	2.26124	1.88269	6.44101e-05	0.0057448	0.00103599
	229723_at	TAGAP															1.88561	3.58506	5.23473	0.00087685	9.24555e-06	7.14778e-05
	229872_s_at	LOC100132999															1.13181	1.2525	2.46021	9.32512e-05	0.0240464	4.07822e-06
	230000_at	RNF213															1.05809	1.83344	3.87572	0.0249374	0.00389526	0.000222274
	230036_at	SAMD9L															1.09557	1.70407	2.37642	0.0108898	0.00540759	0.0019748
	230405_at	C5orf56															1.14062	1.66143	1.90729	0.00462621	0.0358814	0.00234049
	231270_at	CA13															1.17199	1.42177	1.81781	0.00575785	0.000172518	0.00118591
	231873_at	BMPR2															1.09138	1.30822	1.50659	0.00837598	0.00143475	0.0215647
	231956_at	RNF213															1.82691	2.59051	4.0995	0.00155718	0.000474853	0.000112632
	232024_at	GIMAP2															1.56736	2.06734	1.62414	0.00502726	0.0419648	0.00173627
	232138_at	MBNL2															1.37953	1.09788	3.07767	0.00439677	0.0108661	6.36429e-05
	232914_s_at	SYTL2															1.32548	2.39625	3.6164	0.0109029	0.000897457	0.00110488
	233463_at	RASSF6															1.19243	2.68873	3.98706	0.0276291	0.00386531	3.14347e-06
	235061_at	PPM1K															1.18793	1.45491	2.06212	3.89076e-06	0.00983831	0.000137886
	235147_at	LOC100288092															1.1092	1.44692	1.92705	0.0020956	0.0010184	0.000153407
	235643_at	SAMD9L															1.61838	2.29022	2.17511	0.0210518	0.0264295	0.000234235
	235956_at	KIAA1377															1.06978	1.74249	3.18669	0.0053661	0.00551222	1.72204e-05
	242020_s_at	ZBP1															1.09435	2.08681	2.5592	0.00278037	0.00235903	0.000451512
	242234_at	XAF1															2.18564	2.96456	2.86518	0.00178212	0.00284887	0.000123083
	242334_at	NLRP4															1.17198	1.84487	1.86633	5.13139e-06	9.64322e-05	0.000109801
	242601_at	HEPACAM2															2.78506	4.3405	4.33115	7.10774e-05	2.1054e-05	0.00048586
	242625_at	RSAD2															1.95826	3.37627	3.61583	0.00021788	0.00228736	0.000108853
	242752_at	PPM1K															1.28009	2.24032	2.03302	0.00371781	0.00041745	0.00175025
	244011_at	PPM1K															1.40779	2.32313	2.26388	0.00299376	0.00175059	0.000477581
H	206975_at	LTA	-1.729	-1.50025	-1.8393	6.06234e-05	8.40261e-05	6.40987e-05									-1.4599	-2.57081	-2.37895	0.000710086	0.000245434	0.000684396
	207113_s_at	TNF	-1.28357	-1.34624	-1.80369	1.70523e-05	3.39508e-05	0.000161631									-1.29751	-2.66417	-2.63131	0.00418752	0.00517142	7.14104e-06
I	1552417_a_at	NEDD1	-1.36811	-1.46473	-1.45438	0.0281012	0.00139968	0.00175508
	1552822_at	TMX3	-1.35594	-1.73045	-1.19663	0.00272731	0.000995871	0.00256601
	1552921_a_at	FIGNL1	-1.01339	-1.1882	-1.49637	0.020197	0.00397892	0.0028197
	1553120_at	CLSPN	-1.23707	-1.35919	-1.68548	0.00427108	0.00202861	0.001438
	1553141_at	C13orf31	-1.10761	-1.48214	-1.35461	0.0211086	0.0356096	0.0221981
	1553142_at	C13orf31	-1.33918	-1.56461	-1.37385	0.00167796	0.000837115	0.00146527
	1553510_s_at	RQCD1	-1.24565	-1.00625	-1.64871	0.0312525	0.0137557	0.00767213
	1553698_a_at	C1orf96	-1.45283	-1.20646	-1.68904	0.00152836	0.0255489	0.000424461
	1553810_a_at	KIAA1524	-1.13523	-1.47348	-1.97126	0.00478774	0.00021022	0.000326415
	1554328_at	STXBP4	-1.28253	-1.23509	-1.35323	0.00448923	0.00899485	0.00690538
	1554696_s_at	TYMS	-1.13212	-2.07222	-1.61078	0.0252117	0.000423147	0.000364511
	1554885_a_at	PRIM2	-1.11643	-1.06118	-1.14711	0.00692247	0.0343679	0.00365551
	1555106_a_at	CTDSPL2	-1.80236	-1.3913	-1.74824	0.00537768	0.0401995	0.0231466
	1555167_s_at	NAMPT	-1.39175	-1.08545	-1.11329	0.0307282	0.0248907	0.00136324
	1555772_a_at	CDC25A	-1.05504	-1.93264	-2.88044	0.00129798	0.010322	0.00116362
	1555829_at	ESYT2	-1.51018	-1.13523	-1.44143	0.0169299	0.036064	0.000635052
	1555830_s_at	ESYT2	-1.46971	-1.16701	-1.3206	0.0104047	0.00676933	0.00114089
	1557701_s_at	POLH	-1.22341	-1.8038	-1.42409	0.00719402	0.00136884	0.0141992
	1567107_s_at	TPM4	-1.13955	-1.75795	-1.85322	0.00207253	0.00290469	0.00492237
	1569191_at	ZNF826	-1.37115	-1.3743	-1.63004	0.000360569	0.000385265	0.000632131
	201308_s_at	SEPT11	-1.15718	-1.0292	-1.82198	0.0411359	0.00475936	0.010269
	202412_s_at	USP1	-1.06476	-1.13658	-1.55466	0.0260325	0.00730684	0.00129661
	202533_s_at	DHFR	-1.08091	-1.90316	-1.62492	0.00736144	9.89496e-05	0.00326499
	202884_s_at	PPP2R1B	-1.32841	-1.44807	-1.5827	0.0123854	0.0131143	0.00210543
	202886_s_at	PPP2R1B	-1.13874	-1.34074	-1.61333	0.0225933	0.00606417	0.00423879
	203032_s_at	FH	-1.47032	-1.3796	-1.65905	0.0206375	0.00106414	0.00212092
	203234_at	UPP1	-1.01348	-1.45477	-2.06369	1.25252e-05	0.00260839	0.000472104
	203418_at	CCNA2	-1.25998	-2.51733	-2.06159	0.0252607	0.000399706	0.000143848
	203634_s_at	CPT1A	-1.11798	-1.26934	-1.31368	0.0124771	0.000104043	0.00596495
	203925_at	GCLM	-1.12545	-1.2289	-1.35094	0.0242257	0.00455416	0.00106322
	203967_at	CDC6	-1.24374	-1.69176	-2.8223	0.00181744	0.000130226	0.00264006
	203968_s_at	CDC6	-1.2187	-1.98563	-2.40174	0.00270626	0.0051645	0.00227452
	204128_s_at	RFC3	-1.62974	-1.30817	-1.68741	0.0344916	0.0175025	0.012872
	204203_at	CEBPG	-1.01093	-1.60538	-1.4706	0.00228841	0.000758354	0.000665816
	204603_at	EXO1	-1.02755	-1.7958	-1.88904	0.00532075	0.000790805	6.99417e-05
	204728_s_at	WDHD1	-1.24725	-1.62631	-1.82938	0.00131602	0.000679241	0.0130914
	204768_s_at	FEN1	-1.18016	-1.39353	-1.79236	0.0298594	0.00730211	0.00101687
	205023_at	RAD51	-1.16216	-1.18564	-1.04239	0.000463409	0.000998494	0.00301768
	205024_s_at	RAD51	-1.16352	-2.03206	-1.63752	0.00444555	3.37444e-05	7.62971e-05
	205085_at	ORC1L	-1.23347	-1.73646	-2.10243	8.3749e-05	0.000690496	0.000185262
	205393_s_at	CHEK1	-1.43867	-2.34927	-2.59014	0.0178645	0.000112743	0.00327395
	205394_at	CHEK1	-1.32779	-2.21086	-2.48758	0.0110877	0.00180206	0.000871285
	205429_s_at	MPP6	-1.09214	-1.13996	-1.46049	0.0176741	0.00847124	0.0153827
	205681_at	BCL2A1	-1.70507	-1.81315	-2.88033	0.00403464	0.000257324	0.000460368
	206550_s_at	NUP155	-1.1215	-1.15439	-1.18994	0.0237516	0.0044755	0.000484139
	207042_at	E2F2	-1.60781	-1.47323	-1.20039	0.00106866	0.000574789	0.00736972
	208456_s_at	RRAS2	-1.12452	-1.11603	-1.08148	0.0307193	0.00115471	0.000734397
	209344_at	TPM4	-1.19682	-1.86007	-1.91297	0.00134996	0.0058462	0.00254159
	209653_at	KPNA4	-1.14598	-1.01354	-1.21244	0.0105722	0.00624509	0.00944804
	209722_s_at	SERPINB9	-1.67675	-1.52974	-1.66578	0.0245523	0.0341043	0.00244118
	209753_s_at	TMPO	-1.18182	-1.49617	-1.61105	0.00736898	0.00296013	0.00304183
	209754_s_at	TMPO	-1.44476	-1.56432	-1.77973	0.0306266	0.00134471	0.012448
	209921_at	SLC7A11	-1.32119	-3.97595	-2.3429	0.000734857	7.81655e-05	0.00508463
	210240_s_at	CDKN2D	-1.08434	-1.6219	-1.46929	0.00902583	0.000391597	0.0102959
	210286_s_at	SLC4A7	-1.75072	-1.64856	-1.32777	0.00723875	0.00449988	0.00248991
	210567_s_at	SKP2	-1.63859	-2.36269	-2.26243	0.00686086	0.00410117	0.0082317
	210568_s_at	RECQL	-1.07953	-1.25701	-1.15943	0.0323532	0.000342532	0.0287498
	210662_at	KYNU	-1.11801	-1.23701	-1.54395	0.018425	0.0229595	0.00235176
	211080_s_at	NEK2	-1.1796	-2.23572	-1.37813	0.0499376	0.00514693	0.00131991
	211088_s_at	PLK4	-1.81245	-2.10197	-2.4189	0.00433339	0.00115641	0.000869104
	211220_s_at	HSF2	-1.42208	-1.09753	-1.1185	0.0174678	0.0188081	0.0181471
	211804_s_at	CDK2	-1.32698	-1.3521	-1.83075	0.00817421	0.00181914	0.00926626
	211814_s_at	CCNE2	-1.61731	-1.61607	-2.55236	0.0270899	0.00812074	0.00430751
	212021_s_at	MKI67	-1.05995	-2.42119	-1.67709	0.0172885	0.000500432	0.000951827
	212142_at	MCM4	-1.48303	-1.59957	-1.80497	0.0276246	0.00250255	0.0013945
	212481_s_at	TPM4	-1.06042	-1.75979	-1.77999	0.000995432	8.89308e-05	0.000165187
	212619_at	TMEM194A	-1.01755	-1.73882	-1.28326	0.0152136	0.00107292	0.00507138
	213638_at	PHACTR1	-1.55632	-1.93365	-1.235	0.00377449	6.47637e-05	0.00916069
	213926_s_at	AGFG1	-1.40888	-1.15112	-1.18666	0.00112223	0.00972356	0.00518204
	214727_at	BRCA2	-1.01418	-1.73245	-2.34368	0.0201638	0.000326594	0.00675491
	215285_s_at	PHTF1	-1.05938	-1.07617	-1.13485	0.0216645	0.00994246	0.00179839
	215286_s_at	PHTF2	-1.45087	-2.22009	-1.61127	0.0159686	0.00436498	0.0299832
	215509_s_at	BUB1	-1.37882	-2.46083	-1.98073	0.0325677	0.000304744	0.00414151
	215711_s_at	WEE1	-1.32619	-1.56167	-1.48571	0.01457	0.00242308	0.00346619
	215739_s_at	TUBGCP3	-1.05033	-1.01635	-1.07424	0.00613354	0.00702539	0.0378494
	216228_s_at	WDHD1	-1.13211	-1.71673	-1.64749	0.000460536	0.00189708	0.00297934
	216834_at	RGS1	-1.47306	-6.10168	-1.85546	0.0268626	1.40437e-05	0.00310604
	217678_at	SLC7A11	-1.26803	-3.01242	-2.25613	0.00769018	0.000991103	0.000100426
	218073_s_at	TMEM48	-1.09528	-1.37522	-1.295	0.0401134	0.00343442	0.00986142
	219494_at	RAD54B	-1.17387	-1.56104	-2.0715	0.0106612	0.00410499	0.0131276
	220549_at	RAD54B	-1.40687	-1.4932	-1.53151	0.006677	0.00571802	0.00122024
	220651_s_at	MCM10	-1.17027	-2.11096	-2.84566	0.00289537	8.38163e-05	0.000251696
	222118_at	CENPN	-1.11503	-1.66762	-1.87545	0.0261288	0.00570622	0.000311085
	222680_s_at	DTL	-1.60481	-2.75003	-2.598	0.00150467	0.000521964	0.000470563
	223452_s_at	ATL3	-1.00003	-1.34682	-1.51236	0.000760813	0.000376247	0.0131752
	223669_at	HEMGN	-2.82791	-3.33193	-3.04047	0.00308245	7.74328e-05	3.22907e-05
	223670_s_at	HEMGN	-2.28933	-2.15056	-2.06688	0.000225673	0.00379216	0.0223286
	223759_s_at	GSG2	-1.01139	-2.13859	-1.34287	0.00436419	4.67221e-05	0.000123839
	223785_at	FANCI	-1.37207	-1.67705	-1.8345	0.000361905	0.00484664	0.00268393
	224200_s_at	RAD18	-1.29136	-1.17903	-1.58893	0.0145082	0.00337149	0.0222606
	225707_at	ARL6IP6	-1.15132	-1.84336	-1.65591	0.00587436	0.000705301	0.00856236
	226750_at	LARP1B	-1.09863	-1.3168	-1.3133	0.004833	0.00116786	0.0161755
	227012_at	SLC25A40	-1.10637	-1.69353	-1.05417	0.00562863	7.6502e-05	0.00762171
	227403_at	PIGX	-1.13921	-1.09645	-1.11788	0.00241948	0.00837563	0.0123495
	227556_at	NME7	-1.29321	-2.05309	-2.11163	0.00263363	0.000569571	0.00373048
	227787_s_at	MED30	-1.1648	-1.80193	-1.37315	0.0269338	0.0016119	0.00292325
	227928_at	C12orf48	-1.0742	-1.36323	-1.94692	0.00861881	0.000329187	0.00708222
	229437_at	MIR155HG	-1.74223	-2.17138	-3.74827	0.000268776	3.15033e-05	0.00104767
	230218_at	HIC1	-1.43971	-1.46061	-1.96169	0.0094295	0.0117096	0.000241941
	231292_at	EID3	-1.57685	-2.02277	-1.96191	0.00253352	0.00651086	0.00176338
	231303_at	NCRNA00158	-1.37334	-1.97749	-2.28317	0.0107214	0.000639837	0.000205624
	231769_at	FBXO6	-1.11932	-1.17865	-1.20583	0.000334995	2.86011e-05	0.00550769
	231855_at	KIAA1524	-1.05493	-1.5044	-1.86099	0.0148302	0.0227981	0.00165712
	232278_s_at	DEPDC1	-1.05642	-2.2671	-1.55145	0.0199282	0.000673316	0.000705281
	232596_at	DIAPH3	-1.04681	-2.92803	-2.09264	0.0053514	2.30586e-05	4.10027e-06
	234944_s_at	FAM54A	-1.01434	-1.39009	-1.79274	0.000838151	0.000368256	0.000709354
	235088_at	C4orf46	-1.12213	-1.79299	-1.94518	0.00755646	0.00077187	0.00464344
	235178_x_at	ESCO2	-1.21534	-1.89587	-2.05126	0.00860181	0.00268438	0.00104178
	235354_s_at	RSRC1	-1.00144	-1.17347	-1.00655	0.00183751	0.0122755	0.0108726
	235588_at	ESCO2	-1.46274	-1.89095	-2.04355	0.000400621	0.00226568	2.26005e-05
J	201694_s_at	EGR1															-1.23479	-2.00556	-1.21763	0.00117204	0.0144226	1.97434e-05
	219869_s_at	SLC39A8															-1.08361	-1.24206	-1.46034	0.0428305	0.018785	0.00917489
	227404_s_at	EGR1															-1.2278	-2.35595	-1.87727	0.00155271	0.00243	0.0142058

## Sheet: Table S2B_KEGG_CELL_CYCLE
Table S3. Negative Enrichment of KEGG_CELL_CYCLE in EPZ6438 treated lymphoma lines (by GSEA, False Discovery Rate < 0.25)
	Day 2, LCC		Day 2, 10xLCC		Day 4, LCC		Day 4, 10xLCC		Day 6, LCC		Day 6, 10xLCC
	NES	FDR	NES	FDR	NES	FDR	NES	FDR	NES	FDR	NES	FDR
WSU-DLCL2	-2.31879	0	-2.25	0	-2.73	0	-2.71	0	-2.76	0	-2.67	0
KARPAS-422	-1.65	0.0290533	-1.91	0.00276151	-2.32	0	-2.52	0	-2.58	0	-2.48	0
SU-DHL-6							-2.29	0	-1.5	0.101303	-2.38	0
PFEIFFER									-2.46	0.0002	-1.76	0.0256445
NES: Normalized Enrichment Score
FDR: False Discovery Rate, aka q-value.

## Sheet: Table S2C_SPLICEOSOME
Table S4. Negative Enrichment of KEGG_SPLICEOSOME in EPZ6438 treated lymphoma lines (by GSEA, False Discovery Rate < 0.25)
	Day 2, LCC		Day 2, 10xLCC		Day 4, LCC		Day 4, 10xLCC		Day 6, LCC		Day 6, 10xLCC
	NES	FDR	NES	FDR	NES	FDR	NES	FDR	NES	FDR	NES	FDR
WSU-DLCL2	-2.28	0	-2.54	0	-1.74	0.0148233	-1.48	0.0937683	-2.56	0	-2.49	0
KARPAS-422	-2.09	0	-2.47	0	-1.76	0.02593	-2.41	0	-2.61	0	-2.33	0
SU-DHL-6							-2.4	0	-1.75	0.0311412	-2.46	0
PFEIFFER									-3.13	0	-1.39	0.229035
NES: Normalized Enrichment Score
FDR: False Discovery Rate, aka q-value.

## Sheet: Table S2D_E2F
Table S5. Negative Enrichment of E2F binding motif gene sets in EPZ6438 treated lymphoma lines (by GSEA, False Discovery Rate < 0.25).
	WSU-DLCL2						KARPAS-422						SU-DHL-6						PFEIFFER
	Day 2, LCC	Day 2, 10xLCC	Day 4, LCC	Day 4, 10xLCC	Day 6, LCC	Day 6, 10xLCC	Day 2, LCC	Day 2, 10xLCC	Day 4, LCC	Day 4, 10xLCC	Day 6, LCC	Day 6, 10xLCC	Day 2, LCC	Day 2, 10xLCC	Day 4, LCC	Day 4, 10xLCC	Day 6, LCC	Day 6, 10xLCC	Day 2, LCC	Day 2, 10xLCC	Day 4, LCC	Day 4, 10xLCC	Day 6, LCC	Day 6, 10xLCC
Gene Set	FDR	FDR	FDR	FDR	FDR	FDR	FDR	FDR	FDR	FDR	FDR	FDR	FDR	FDR	FDR	FDR	FDR	FDR	FDR	FDR	FDR	FDR	FDR	FDR
V$E2F1DP1RB_01	0	0	0	0	0	0	0.0240807	0.00146065	0.00105952	0	0	0			0.179334	0.000104449	0.163677	0				0.0906323	0.0178362	0.000307958
V$E2F_Q6	0	0	0	0	0	0	0.0142572	0.000616394	0.0005908	0	0	0			0.180838	0	0.097467	0				0.0480155	0.0101894	0.000240169
V$E2F1_Q6	0	0	0	0	0	0	0.00769888	0.00103178	0.000525155	0	0	0			0.177767	0.000229787	0.128939	0				0.0429797	0.0104113	0.000180127
SGCGSSAAA_V$E2F1DP2_01	0	0	0	0	0	0	0.00219149	0.000527488	0	0	0	0				7.65957e-05	0.121291	0				0.10125	0.00792457	0.000451488
V$E2F4DP1_01	0	0	0	0	0	0	0.0114321	0.00114429	0.000635714	0	0	0			0.218775	0.000143617	0.130478	0				0.0395508	0.0243573	0.000288203
V$E2F_Q4	0	0	0	0	0	0	0.0164845	0.000539345	0.0006752	0	0	0			0.226775		0.102298	0					0.00801847	0.00020586
V$E2F1DP2_01	0	0	0	0	0	0	0.0147306	0.00168583	0.000827094	0	0	0				9.57447e-05	0.111879	0				0.0372649	0.0100161	0.00039
V$E2F_02	0	0	0	0	0	0	0.0150228	0.00211951	0.000763472	0	0	0				8.20669e-05	0.0916002	0				0.037845	0.0100894	0.000480339
V$E2F1DP1_01	0	0	0	0	0	0	0.0156829	0.00137756	0.000768582	0	0	0			0.233789	0.000114894	0.128393	0				0.0366946	0.0108569	0.00078
V$E2F4DP2_01	0	0	0	0	0	0	0.0151897	0.00346115	0.000708938	0	0	0				8.83797e-05	0.105213	0				0.0385652	0.0109701	0.000360254
V$E2F_Q3	0	0	0	0	0	0	0.068494	0.00644204	0.00243744	0	0	0			0.10682		0.139369	0				0.0996131	0.0108238	0.00778453
V$E2F1_Q6_01	0	0	0	0	0	0	0.0117192	0.000396825	0	0	0	0			0.112394		0.118167	0					0.000287749	0.000419239
V$E2F_Q3_01	0	0	0	0	0	0	0.151872	0.00589456	0.00047264	0	0	0			0.156305	0.000145178		0.000301266					0.0019143	0.00899225
V$E2F1_Q3	6.22711e-05	0	0	0	0	0	0.0398827	0.00358059	0.00709609	0	0	0			0.138662		0.0725483	0				0.101477	0.0194369	0.000331099
V$E2F_Q4_01	0.000116439	0	0	0	0	0	0.0235207	0.0009286	0.000794643	0	0	0			0.12803		0.167146	0				0.0782328	0.000301451	0.000297989
V$E2F1_Q4_01	0	0	0	0	0	0	0.201328	0.00556401	0.000787733	0	0	0			0.24835	0.000424774		0.000549829					0.00194387	0.00734895
V$E2F_03	0.00010959	0	0	0	0	0	0.107111	0.00582896	0.00517565	0	0	0			0.163298	0.000401176	0.217714	0.000445303				0.0839414	0.00137982	0.000335954
V$E2F_Q6_01	0.000103502	0	0	0	0	0	0.15433	0.00560572	0.000720883	0	0	0			0.127577		0.219208	5.89955e-05					0.000981417	0.000873996
V$E2F_01	0.0261956	0.00244975	0.00086397	0.00234183	0.000145697	0.000450415	0.101884	0.0332659	0.000585267	0.000120897	6.4596e-05	0				0.0177144		0.0315204
V$E2F1_Q4	0.118689	0.039018	0.000669172	0.000328824	0	7.54764e-05			0.0454978	0.000593509	0.0145295	0.00279151						0.131251					0.000853673
V$E2F1_Q3_01	0.230375		0.0120886	0.0468776	0.0264408	0.059101			0.0580272	0.0198018	0.0251789	0.0149779			0.192845								0.0117071
V$E2F_Q2												0.125972											0.0251125
FDR: False Discovery Rate, aka q-value.
